# Supplementary material for: Large scale variation in Enterococcus faecalis illustrated by the genome analysis of strain OG1RF
Source: PubMed Central journal article supplement (PMC2530867; doi:10.1186/gb-2008-9-7-r110), 2008-07-08
Supplement: gb-2008-9-7-r110-S1.pdf [file gb-2008-9-7-r110-S1.pdf]

Supplemental Table S1: ORFs unique to OG1RF

| ID <sup>a</sup> | START  | STOP                 | SIZE | DEFINITION                                    | GI number <sup>b</sup> | Tn917 <sup>c</sup> |
|-----------------|--------|----------------------|------|-----------------------------------------------|------------------------|--------------------|
| OG1RF_0001      | 35502  | 36008 + <sup>d</sup> | 169  | hypothetical membrane protein                 |                        |                    |
| OG1RF_0002      | 79572  | 80087 +              | 172  | hypothetical protein                          |                        |                    |
| OG1RF_0003      | 80087  | 80143 +              | 19   | hypothetical protein                          |                        |                    |
| OG1RF_0004      | 80128  | 80229 -              | 34   | hypothetical protein                          |                        |                    |
| OG1RF_0005      | 80242  | 80757 +              | 172  | conserved hypothetical protein                | 116873726              |                    |
| OG1RF_0006      | 80757  | 82154 +              | 466  | conserved hypothetical protein                | 25012005               |                    |
| OG1RF_0007      | 82151  | 82456 +              | 102  | hypothetical protein                          |                        |                    |
| OG1RF_0008      | 82472  | 82732 +              | 87   | hypothetical protein                          |                        |                    |
| OG1RF_0009      | 143070 | 143468 +             | 133  | conserved hypothetical membrane protein       | 25010299               |                    |
| OG1RF_0010      | 143468 | 144706 +             | 413  | possible lipase                               | 25012005               |                    |
| OG1RF_0011      | 144716 | 145030 +             | 105  | hypothetical protein                          |                        |                    |
| OG1RF_0012      | 145035 | 145301 +             | 89   | hypothetical protein                          |                        |                    |
| OG1RF_0013      | 294095 | 295453 +             | 453  | secreted antigen (EF0394) <sup>e</sup>        | 29375030               |                    |
| OG1RF_0014      | 319060 | 319215 +             | 52   | hypothetical protein                          |                        |                    |
| OG1RF_0015      | 319212 | 320333 +             | 374  | conserved hypothetical protein                | 81097058               |                    |
| OG1RF_0016      | 394987 | 395835 -             | 283  | conserved hypothetical protein                | 72162835               |                    |
| OG1RF_0017      | 416527 | 420540 +             | 1338 | CRISPR associated protein ( <i>cas_csn1</i> ) | 47097148               | C11                |
| OG1RF_0018      | 420541 | 421407 +             | 289  | CRISPR associated protein ( <i>cas1</i> )     | 47097147               |                    |
| OG1RF_0019      | 421404 | 421733 +             | 110  | CRISPR associated protein ( <i>cas2</i> )     | 15675043               |                    |
| OG1RF_0020      | 421734 | 422393 +             | 220  | CRISPR associated protein ( <i>cas_csn2</i> ) | 47097145               |                    |
| OG1RF_0022      | 423326 | 423682 +             | 119  | hypothetical membrane protein                 |                        |                    |
| OG1RF_0023      | 504238 | 504375 -             | 46   | hypothetical protein                          |                        |                    |
| OG1RF_0024      | 530916 | 531041 -             | 42   | hypothetical protein                          |                        |                    |
| OG1RF_0025      | 725858 | 726289 +             | 144  | conserved hypothetical protein                | 29375549               | C10                |
| OG1RF_0026      | 726595 | 726726 -             | 44   | hypothetical protein                          |                        |                    |
| OG1RF_0027      | 726742 | 727125 +             | 128  | hypothetical secreted protein                 |                        |                    |
| OG1RF_0028      | 727219 | 727386 +             | 56   | hypothetical protein                          |                        |                    |
| OG1RF_0029      | 727422 | 727817 +             | 132  | hypothetical protein                          |                        |                    |
| OG1RF_0030      | 727833 | 728126 +             | 98   | hypothetical protein                          |                        |                    |
| OG1RF_0031      | 728205 | 728615 +             | 137  | conserved hypothetical secreted protein       | 76787389               |                    |
| OG1RF_0032      | 728608 | 728901 +             | 98   | hypothetical protein                          |                        |                    |
| OG1RF_0033      | 729061 | 729393 +             | 111  | pseudogene of conserved hypothetical protein  | 125717807              |                    |
| OG1RF_0034      | 729395 | 730957 +             | 521  | conserved hypothetical protein                | 77409424               |                    |
| OG1RF_0035      | 730977 | 731261 +             | 95   | hypothetical protein                          |                        |                    |
| OG1RF_0036      | 731269 | 731394 +             | 42   | hypothetical protein                          | 29374661               |                    |
| OG1RF_0037      | 731395 | 731574 +             | 60   | hypothetical protein                          |                        |                    |
| OG1RF_0038      | 798315 | 798425 +             | 37   | hypothetical protein                          |                        |                    |
| OG1RF_0039      | 825385 | 828604 +             | 1073 | probable adhesin (frameshift)                 | 69244908               |                    |
| OG1RF_0040      | 828708 | 829034 +             | 109  | hypothetical protein                          | 29376423               |                    |
| OG1RF_0041      | 829037 | 829411 +             | 125  | conserved hypothetical protein                | 29376422               | A9                 |
| OG1RF_0042      | 829411 | 830766 +             | 452  | probable cell division protein FtsK/SpoIIIE   | 69244912               | C8                 |
| OG1RF_0043      | 830778 | 831782 +             | 335  | DNA (cytosine-5-)-methyltransferase           | 69244913               |                    |
| OG1RF_0044      | 831799 | 832119 +             | 107  | conserved hypothetical protein                | 69244914               |                    |
| OG1RF_0045      | 832358 | 833539 +             | 394  | probable replication initiation protein       | 29376415               |                    |
| OG1RF_0046      | 833557 | 833778 +             | 74   | conserved hypothetical transposon protein     | 29376412               |                    |
| OG1RF_0047      | 833799 | 834299 +             | 167  | antirestriction protein ArdA                  | 29376411               |                    |

| ID <sup>a</sup> | START   | STOP    | SIZE | DEFINITION | GI number <sup>b</sup>                              | Tn917 <sup>c</sup> |     |
|-----------------|---------|---------|------|------------|-----------------------------------------------------|--------------------|-----|
| OG1RF_0048      | 834381  | 835331  | +    | 317        | conserved hypothetical protein                      | 116872488          | A3  |
| OG1RF_0049      | 835333  | 835797  | +    | 155        | conserved hypothetical protein                      | 116872489          | A6  |
| OG1RF_0050      | 835797  | 837683  | +    | 629        | possible DNA repair protein RecN                    | 116872490          | A12 |
| OG1RF_0051      | 837843  | 838136  | +    | 98         | possible conjugative transposon membrane protein    | 69244919           |     |
| OG1RF_0052      | 838114  | 840582  | +    | 823        | conserved hypothetical protein                      | 29376407           | B3  |
| OG1RF_0053      | 840566  | 842386  | +    | 607        | conserved hypothetical membrane protein             | 69247878           |     |
| OG1RF_0054      | 842447  | 843451  | +    | 335        | NlpC domain lipoprotein/C40 family peptidase        | 16803144           |     |
| OG1RF_0055      | 843465  | 844403  | +    | 313        | possible conjugative transposon protein             | 15923389           | B6  |
| OG1RF_0056      | 844571  | 845689  | +    | 373        | possible ATP-binding protein                        | 27466959           |     |
| OG1RF_0057      | 846091  | 846867  | -    | 259        | possible HAD family haloacid dehalogenase hydrolase | 27467977           |     |
| OG1RF_0058      | 847259  | 847663  | +    | 135        | conserved hypothetical protein                      | 125718781          |     |
| OG1RF_0059      | 847698  | 848345  | +    | 216        | possible glutathionine S-transferase                | 39933897           |     |
| OG1RF_0060      | 848702  | 850171  | +    | 490        | conserved hypothetical protein                      | 69245042           | C6  |
| OG1RF_0061      | 850171  | 850506  | +    | 112        | hypothetical protein                                |                    |     |
| OG1RF_0062      | 850525  | 851037  | +    | 171        | pseudogene of possible Cna family adhesin           | 69244094           |     |
| OG1RF_0063      | 851158  | 855372  | +    | 1405       | probable collagen adhesion protein                  | 52140206           | C1  |
| OG1RF_0064      | 855608  | 855853  | +    | 82         | hypothetical protein                                |                    |     |
| OG1RF_0065      | 855884  | 855976  | +    | 31         | possible extracellular protein                      |                    |     |
| OG1RF_0066      | 856019  | 856243  | +    | 75         | hypothetical protein                                |                    |     |
| OG1RF_0067      | 856266  | 857285  | +    | 340        | hypothetical protein                                | 66821251           |     |
| OG1RF_0068      | 857430  | 857855  | +    | 142        | conserved hypothetical protein                      | 69247694           | B2  |
| OG1RF_0069      | 857845  | 858081  | +    | 79         | conserved hypothetical protein                      | 69247695           | B7  |
| OG1RF_0070      | 858159  | 858464  | -    | 102        | probable transcriptional regulator                  | 116512576          |     |
| OG1RF_0071      | 858566  | 859177  | +    | 204        | nitroreductase                                      | 116512577          |     |
| OG1RF_0072      | 859418  | 859828  | -    | 137        | conserved hypothetical membrane protein             | 118587099          |     |
| OG1RF_0073      | 859821  | 860273  | -    | 151        | possible LytR family response regulator             | 81428169           |     |
| OG1RF_0074      | 860315  | 860752  | -    | 146        | conserved hypothetical membrane protein             | 118587101          |     |
| OG1RF_0075      | 860794  | 860913  | -    | 40         | hypothetical protein                                |                    |     |
| OG1RF_0076      | 860924  | 861532  | +    | 203        | hypothetical membrane protein                       |                    |     |
| OG1RF_0077      | 861997  | 862107  | +    | 37         | hypothetical protein                                |                    |     |
| OG1RF_0078      | 862178  | 864250  | +    | 691        | probable ATP-binding nuclease                       | 56963170           |     |
| OG1RF_0079      | 864243  | 866105  | +    | 621        | excision endonuclease subunit UvrD                  | 28867288           |     |
| OG1RF_0080      | 866442  | 866777  | +    | 112        | pseudogene of nitroreductase                        | 24378844           |     |
| OG1RF_0081      | 867224  | 867976  | +    | 251        | hypothetical protein                                |                    | C7  |
| OG1RF_0082      | 868056  | 869654  | +    | 533        | hypothetical protein                                |                    |     |
| OG1RF_0083      | 869700  | 869855  | +    | 52         | hypothetical membrane protein                       |                    |     |
| OG1RF_0084      | 870492  | 871022  | +    | 177        | hypothetical protein                                |                    |     |
| OG1RF_0085      | 871059  | 871832  | +    | 258        | hypothetical membrane protein                       |                    |     |
| OG1RF_0086      | 872173  | 872262  | +    | 30         | hypothetical protein                                |                    |     |
| OG1RF_0087      | 872259  | 872630  | +    | 124        | conserved hypothetical protein                      | 69244684           |     |
| OG1RF_0088      | 872681  | 873829  | +    | 383        | probable integrase                                  | 69244690           | A8  |
| OG1RF_0089      | 873831  | 874004  | +    | 58         | hypothetical protein                                |                    |     |
| OG1RF_0090      | 1145408 | 1145701 | +    | 98         | conserved hypothetical protein                      | 125624746          |     |
| OG1RF_0091      | 1145768 | 1149205 | +    | 1146       | conserved hypothetical membrane protein             | 116512650          | B11 |
| OG1RF_0092      | 1149208 | 1149705 | +    | 166        | hypothetical protein                                |                    |     |
| OG1RF_0093      | 1149720 | 1149989 | +    | 90         | hypothetical protein                                |                    |     |
| OG1RF_0094      | 1149986 | 1151158 | +    | 391        | conserved hypothetical protein                      | 15896941           |     |
| OG1RF_0095      | 1151139 | 1155569 | +    | 1477       | cell division protein FtsK/SpoIIIE                  | 15896940           |     |
| OG1RF_0096      | 1155566 | 1155976 | +    | 137        | conserved hypothetical protein                      | 15896939           |     |

| ID <sup>a</sup> | START   | STOP    | SIZE | DEFINITION | GI number <sup>b</sup>                                             | Tn917 <sup>c</sup> |     |
|-----------------|---------|---------|------|------------|--------------------------------------------------------------------|--------------------|-----|
| OG1RF_0097      | 1155977 | 1156231 | +    | 85         | hypothetical protein                                               |                    |     |
| OG1RF_0098      | 1156244 | 1156600 | +    | 119        | conserved hypothetical protein                                     | 16799474           | D5  |
| OG1RF_0099      | 1156591 | 1158204 | +    | 538        | conserved hypothetical protein                                     | 16799475           |     |
| OG1RF_0100      | 1158185 | 1158970 | +    | 262        | conserved hypothetical protein                                     | 16799476           |     |
| OG1RF_0101      | 1159005 | 1159523 | +    | 173        | pseudogene of conserved hypothetical protein                       | 16799475           |     |
| OG1RF_0102      | 1159549 | 1160343 | +    | 265        | conserved hypothetical protein                                     | 116874092          |     |
| OG1RF_0103      | 1160398 | 1160973 | +    | 192        | pseudogene of conserved hypothetical protein                       | 16799475           |     |
| OG1RF_0104      | 1161120 | 1161830 | +    | 237        | conserved hypothetical protein                                     | 116871754          |     |
| OG1RF_0105      | 1162107 | 1164602 | +    | 832        | pseudogene of cell division protein FtsK/SpoIIIE                   | 23098771           |     |
| OG1RF_0106      | 1164617 | 1165488 | +    | 290.6      | conserved hypothetical membrane protein (frameshift)               | 52144636           |     |
| OG1RF_0107      | 1165501 | 1165947 | +    | 149        | conserved hypothetical protein                                     |                    | B5  |
| OG1RF_0108      | 1165967 | 1166239 | +    | 91         | hypothetical protein                                               |                    |     |
| OG1RF_0109      | 1166253 | 1166897 | +    | 215        | hypothetical protein                                               |                    |     |
| OG1RF_0110      | 1166913 | 1168454 | +    | 514        | pseudogene of conserved hypothetical protein                       | 49477502           |     |
| OG1RF_0111      | 1168442 | 1169149 | +    | 236        | hypothetical protein                                               |                    |     |
| OG1RF_0112      | 1169175 | 1169873 | +    | 233        | pseudogene of conserved hypothetical protein                       | 116871477          |     |
| OG1RF_0113      | 1169861 | 1170577 | +    | 239        | hypothetical membrane protein                                      |                    |     |
| OG1RF_0114      | 1170835 | 1171263 | +    | 143        | conserved hypothetical protein                                     | 116871479          | D1  |
| OG1RF_0115      | 1171272 | 1171721 | +    | 150        | conserved hypothetical protein                                     | 49477505           |     |
| OG1RF_0116      | 1171795 | 1172295 | +    | 167        | hypothetical membrane protein                                      |                    |     |
| OG1RF_0117      | 1272374 | 1272883 | +    | 170        | ECF family DNA directed RNA polymerase sigma                       | 89096444           |     |
| OG1RF_0118      | 1273721 | 1273981 | +    | 87         | hypothetical protein                                               | 52081095           |     |
| OG1RF_0119      | 1272884 | 1273981 | +    | 366        | conserved hypothetical protein                                     | 34496255           |     |
| OG1RF_0120      | 1290363 | 1291844 | +    | 494        | BglG family transcriptional antiterminator                         | 47095712           |     |
| OG1RF_0121      | 1291834 | 1292286 | +    | 151        | PTS family porter component IIA                                    | 15901457           | A4  |
| OG1RF_0122      | 1292286 | 1292603 | +    | 106        | PTS family porter component IIB                                    | 15901455           | A5  |
| OG1RF_0123      | 1292623 | 1293072 | +    | 150        | PTS family porter component IIA                                    | 76788396           | B9  |
| OG1RF_0124      | 1293182 | 1294282 | +    | 367        | PTS family porter component IIC                                    | 15901454           | A2  |
| OG1RF_0125      | 1294420 | 1295109 | +    | 230        | ribulose-phosphate 3-epimerase                                     | 15901453           |     |
| OG1RF_0126      | 1512391 | 1513491 | -    | 367        | ABC superfamily ATP binding cassette transporter, membrane protein | 69245312           |     |
| OG1RF_0127      | 1513484 | 1514176 | -    | 231        | ABC superfamily ATP binding cassette transporter, binding protein  | 124520827          | C5  |
| OG1RF_0128      | 1602425 | 1603462 | -    | 346        | conserved hypothetical membrane protein                            | 16799878           |     |
| OG1RF_0129      | 1603504 | 1604055 | -    | 184        | WxL domain surface protein                                         | 15673181           |     |
| OG1RF_0130      | 1604048 | 1604407 | -    | 120        | LPxTG-domain surface protein                                       |                    |     |
| OG1RF_0131      | 1604383 | 1607043 | -    | 887        | conserved hypothetical protein                                     | 15673179           |     |
| OG1RF_0132      | 1607271 | 1608728 | +    | 486        | conserved hypothetical protein                                     | 116872203          |     |
| OG1RF_0133      | 1608837 | 1610759 | +    | 641        | conserved hypothetical membrane protein                            | 77974891           |     |
| OG1RF_0134      | 1610944 | 1611780 | -    | 279        | PP-loop superfamily ATP-binding protein                            | 116493418          |     |
| OG1RF_0135      | 1611886 | 1612599 | -    | 238        | ABC superfamily ATP binding cassette transporter, ABC protein      | 55820385           |     |
| OG1RF_0136      | 1612601 | 1613386 | -    | 262        | protein                                                            | 55822275           |     |
| OG1RF_0137      | 1613386 | 1614372 | -    | 329        | protein                                                            | 55822274           |     |
| OG1RF_0138      | 1614391 | 1615047 | -    | 219        | transcriptional regulator                                          | 116493423          |     |
| OG1RF_0139      | 1615207 | 1616481 | +    | 425        | conserved hypothetical protein                                     | 116493422          |     |
| OG1RF_0140      | 1616519 | 1617262 | +    | 248        | NCAIR mutase                                                       | 116493421          |     |
| OG1RF_0141      | 1664191 | 1665858 | -    | 556        | glycosyl hydrolase                                                 | 81428811           | B1  |
| OG1RF_0142      | 1665873 | 1667582 | -    | 570        | PTS family porter component IIABC                                  | 30023990           | C3  |
| OG1RF_0143      | 1667742 | 1668449 | -    | 236        | GntR family transcriptional regulator                              | 82745913           |     |
| OG1RF_0144      | 1687265 | 1688902 | -    | 546        | conserved hypothetical protein                                     | 15923072           | A10 |

| ID <sup>a</sup> | START   | STOP    | SIZE   | DEFINITION                                                                           | GI number <sup>b</sup> | Tn917 <sup>c</sup> |
|-----------------|---------|---------|--------|--------------------------------------------------------------------------------------|------------------------|--------------------|
| OG1RF_0145      | 1688928 | 1689056 | - 43   | pseudogene of conserved hypothetical protein                                         | 29376482               |                    |
| OG1RF_0146      | 1689467 | 1690453 | - 329  | conserved hypothetical protein                                                       | 51245884               |                    |
| OG1RF_0147      | 1690471 | 1691562 | - 364  | DNA (cytosine-5-)-methyltransferase                                                  | 42779446               |                    |
| OG1RF_0148      | 1716523 | 1716969 | - 149  | conserved hypothetical secreted protein                                              | 69244407               |                    |
| OG1RF_0150      | 1777278 | 1778780 | + 501  | conserved hypothetical protein                                                       | 116873914              | A7                 |
| OG1RF_0151      | 1783816 | 1784796 | - 327  | possible glycosyltransferase                                                         | 16804588               |                    |
| OG1RF_0152      | 1786113 | 1786217 | + 35   | hypothetical protein                                                                 |                        |                    |
| OG1RF_0153      | 1786477 | 1786602 | - 42   | hypothetical protein                                                                 |                        |                    |
| OG1RF_0154      | 1787005 | 1787118 | - 38   | hypothetical protein                                                                 |                        |                    |
| OG1RF_0155      | 1787521 | 1788945 | - 475  | MOP superfamily multidrug/oligosaccharidyl-lipid/polysaccharide flippase transporter | 124521111              |                    |
| OG1RF_0156      | 1788993 | 1790378 | - 462  | probable O-antigen polymerase (EF2169)                                               | 29376677               |                    |
| OG1RF_0157      | 1790393 | 1791604 | - 404  | CDP-glycerol:poly(glycerophosphate) glycerophosphotransferase                        | 106887729              |                    |
| OG1RF_0158      | 1791650 | 1792051 | - 134  | glycerol-3-phosphate cytidyltransferase                                              | 28377193               |                    |
| OG1RF_0159      | 1792080 | 1793285 | - 402  | CDP-glycerol:poly(glycerophosphate) glycerophosphotransferase                        | 106887729              |                    |
| OG1RF_0160      | 1793311 | 1794291 | - 327  | glycosyltransferase (EF2170)                                                         | 29376678               |                    |
| OG1RF_0161      | 1794302 | 1795279 | - 326  | glycosyltransferase                                                                  | 55823030               |                    |
| OG1RF_0162      | 1796446 | 1796670 | + 75   | pseudogene of transposase                                                            | 69248334               |                    |
| OG1RF_0163      | 1796720 | 1799176 | - 819  | conserved hypothetical protein                                                       | 29376682               | C2                 |
| OG1RF_0164      | 1799420 | 1799623 | - 68   | pseudogene of licD-related protein                                                   | 29376683               |                    |
| OG1RF_0165      | 1846772 | 1852468 | - 1899 | probable adhesin (EF2224)                                                            | 29376731               |                    |
| OG1RF_0166      | 1873057 | 1873362 | - 102  | PTS family possible cellobiose porter component IIB                                  | 69244697               |                    |
| OG1RF_0167      | 1873390 | 1874985 | - 532  | SSS family solute:sodium (Na+) symporter                                             | 56962210               |                    |
| OG1RF_0168      | 1875009 | 1875899 | - 297  | myo-inositol catabolism protein IolE                                                 | 28210254               |                    |
| OG1RF_0169      | 1875921 | 1876940 | - 340  | inositol 2-dehydrogenase                                                             | 28210255               | A11                |
| OG1RF_0170      | 1876964 | 1877971 | - 336  | inositol 2-dehydrogenase                                                             | 16081021               |                    |
| OG1RF_0171      | 1878145 | 1879602 | - 486  | methylmalonate-semialdehyde dehydrogenase (acylating)                                | 52082532               |                    |
| OG1RF_0172      | 1879642 | 1880481 | - 280  | myo-inositol catabolism protein IolB                                                 | 16799479               | D3                 |
| OG1RF_0173      | 1880520 | 1882436 | - 639  | myo-inositol catabolism protein IolD                                                 | 15614881               |                    |
| OG1RF_0174      | 1882447 | 1883481 | - 345  | 2-dehydro-3-deoxygluconokinase                                                       | 18309069               |                    |
| OG1RF_0175      | 1883639 | 1884655 | - 339  | DNA binding protein                                                                  | 15890504               |                    |
| OG1RF_0176      | 1884841 | 1886676 | - 612  | membrane GTP-binding protein LepA (EF2352)                                           | 29376853               |                    |
| OG1RF_0177      | 1914552 | 1914887 | - 112  | hypothetical protein                                                                 |                        |                    |
| OG1RF_0178      | 1914891 | 1915181 | - 97   | conserved hypothetical protein                                                       | 125718554              |                    |
| OG1RF_0179      | 1915195 | 1916508 | - 438  | conserved hypothetical protein                                                       | 125718555              |                    |
| OG1RF_0180      | 1917467 | 1918003 | - 179  | conserved hypothetical protein                                                       | 125718556              |                    |
| OG1RF_0181      | 1923812 | 1925998 | - 729  | possible ATP-binding protein                                                         | 106894227              |                    |
| OG1RF_0182      | 1926001 | 1927263 | - 421  | possible methyltransferase                                                           | 42784651               |                    |
| OG1RF_0183      | 1943002 | 1943193 | - 64   | hypothetical protein                                                                 |                        |                    |
| OG1RF_0184      | 2000283 | 2004539 | - 1419 | cell surface anchor protein CnaB (EF2466)                                            | 29376960               |                    |
| OG1RF_0185      | 2018677 | 2018778 | - 34   | hypothetical protein                                                                 |                        |                    |
| OG1RF_0186      | 2028700 | 2033007 | - 1436 | probable adhesin (EF2505)                                                            | 29376997               |                    |
| OG1RF_0187      | 2036086 | 2036412 | + 109  | possible LIV-E family branched chain amino acid exporter AzID                        | 69245522               |                    |
| OG1RF_0188      | 2200969 | 2202471 | + 501  | conserved hypothetical membrane protein                                              | 92089170               |                    |
| OG1RF_0189      | 2216258 | 2217355 | - 366  | conserved hypothetical membrane protein                                              | 29377266               |                    |
| OG1RF_0190      | 2273034 | 2274098 | + 355  | conserved hypothetical lipoprotein                                                   |                        |                    |
| OG1RF_0191      | 2281411 | 2282121 | - 237  | M15 family muramoylpentapeptide carboxypeptidase                                     | 29376800               |                    |
| OG1RF_0192      | 2282219 | 2283331 | - 371  | sensor histidine kinase VanSG                                                        | 119635646              | C4                 |
| OG1RF_0193      | 2283324 | 2284028 | - 235  | response regulator VanRG                                                             | 119635645              | B10                |

| ID <sup>a</sup> | START   | STOP    | SIZE | DEFINITION | GI number <sup>b</sup>                                                            | Tn917 <sup>c</sup> |     |
|-----------------|---------|---------|------|------------|-----------------------------------------------------------------------------------|--------------------|-----|
| OG1RF_0194      | 2357843 | 2359177 | -    | 445        | probable S1 family extracellular protease                                         | 116873306          |     |
| OG1RF_0195      | 2359316 | 2360152 | +    | 279        | conserved hypothetical protein                                                    | 116515314          | D2  |
| OG1RF_0196      | 2375652 | 2375762 | +    | 37         | enterococcal conserved hypothetical protein                                       |                    |     |
| OG1RF_0197      | 2502166 | 2502267 | +    | 34         | hypothetical protein                                                              |                    |     |
| OG1RF_0198      | 2514398 | 2515117 | -    | 240        | response regulator                                                                | 47567135           |     |
| OG1RF_0199      | 2515119 | 2516447 | -    | 443        | sensor histidine kinase                                                           | 47567134           |     |
| OG1RF_0200      | 2516676 | 2517908 | -    | 411        | ABC superfamily ATP binding cassette transporter, membrane protein                | 16078054           |     |
| OG1RF_0201      | 2517910 | 2518818 | -    | 303        | ABC superfamily ATP binding cassette transporter ABC protein                      | 56965674           |     |
| OG1RF_0202      | 2546408 | 2546986 | -    | 193        | phosphatidyltransferase                                                           | 29377600           |     |
| OG1RF_0203      | 2547406 | 2547639 | -    | 78         | pseudogene of conserved hypothetical protein                                      | 16799475           |     |
| OG1RF_0204      | 2547682 | 2547975 | -    | 98         | hypothetical protein                                                              |                    |     |
| OG1RF_0205      | 2547985 | 2548284 | -    | 100        | hypothetical protein                                                              |                    |     |
| OG1RF_0206      | 2548307 | 2549707 | -    | 467        | pseudogene of conserved hypothetical protein                                      | 16799475           |     |
| OG1RF_0207      | 2549698 | 2550060 | -    | 121        | conserved hypothetical protein                                                    | 22855014           |     |
| OG1RF_0208      | 2550070 | 2550324 | -    | 85         | conserved hypothetical protein                                                    | 125718209          | A1  |
| OG1RF_0209      | 2554926 | 2555630 | -    | 235        | WxL domain surface protein (EF3154, EF3153)                                       | 29377607           | C9  |
| OG1RF_0210      | 2555726 | 2556439 | -    | 238        | WxL domain surface protein (EF3154, EF3153)                                       | 29377606           |     |
| OG1RF_0211      | 2562516 | 2562659 | -    | 48         | enterococcal conserved hypothetical protein                                       | 29377690           |     |
| OG1RF_0212      | 2563068 | 2563193 | -    | 42         | enterococcal conserved hypothetical protein                                       |                    |     |
| OG1RF_0213      | 2589319 | 2593980 | -    | 1554       | WxL domain surface protein (EF3188)                                               | 29377638           |     |
| OG1RF_0214      | 2615176 | 2617656 | -    | 827        | probable choline binding protein                                                  | 29377145           |     |
| OG1RF_0215      | 2618051 | 2618206 | -    | 52         | hypothetical protein                                                              |                    |     |
| OG1RF_0216      | 2618199 | 2618339 | -    | 47         | hypothetical protein                                                              |                    |     |
| OG1RF_0217      | 2618802 | 2619362 | -    | 187        | hypothetical protein                                                              |                    |     |
| OG1RF_0218      | 2619552 | 2622569 | -    | 1006       | probable phosphatidylglycerol--membrane-oligosaccharide glycerophosphotransferase | 69244263           |     |
| OG1RF_0219      | 2635203 | 2635340 | -    | 46         | enterococcal conserved hypothetical protein                                       |                    |     |
| OG1RF_0220      | 2635352 | 2635693 | -    | 114        | probable endoribonuclease MazF                                                    | 69244828           |     |
| OG1RF_0221      | 2635693 | 2635923 | -    | 77         | probable antitoxin MazE                                                           | 69244829           |     |
| OG1RF_0222      | 2637707 | 2638345 | -    | 213        | probable chitin binding protein                                                   | 29375001           |     |
| OG1RF_0223      | 2641016 | 2641120 | +    | 35         | enterococcal conserved hypothetical protein (EF3249)                              | 29377692           |     |
| OG1RF_0224      | 2641315 | 2646006 | -    | 1564       | WxL domain surface protein (EF3248)                                               | 29377691           | C12 |
| OG1RF_0225      | 2646355 | 2648313 | -    | 653        | WxL domain surface protein (EF3250)                                               | 29377693           |     |
| OG1RF_0226      | 2648416 | 2649352 | -    | 312        | conserved hypothetical membrane protein                                           | 29377694           |     |
| OG1RF_0227      | 2649683 | 2653549 | -    | 1289       | WxL domain surface protein (EF3252)                                               | 29377695           |     |
| OG1RF_0228      | 1714318 | 1715325 |      | 336        | probable DNA methyltransferase                                                    | 69244404           |     |

<sup>a</sup> Only the ORFs unique in OG1RF were labeled

<sup>b</sup> The GI number of the best hit or the most relevant is indicated

<sup>c</sup> New Tn917 insertion mutants identified in OG1RF unique sequence (plate 7 with coordinates as indicated).

<sup>d</sup> Orientation of the ORF

<sup>e</sup> An "EFxxxx" locus tag number in parentheses indicates polymorphism at the protein level between V583 and OG1RF
