# Supplementary material for: Large scale variation in Enterococcus faecalis illustrated by the genome analysis of strain OG1RF
Source: PubMed Central journal article supplement (PMC2530867; doi:10.1186/gb-2008-9-7-r110), 2008-07-08
Supplement: gb-2008-9-7-r110-S2.pdf [file gb-2008-9-7-r110-S2.pdf]

| Locus name      | Gene name         | aa   | Category | Comments                                                             |
|-----------------|-------------------|------|----------|----------------------------------------------------------------------|
| EF0392          | EF0392            | 764  | WxL      | (Brinster <i>et al.</i> , 2007a)                                     |
| EF0713-4        | EF0713            | 245  | WxL      |                                                                      |
|                 | EF0714            | 763  | WxL      |                                                                      |
| EF0750-7        | EF0750            | 112  | Cwa      | Regulated by the <i>fsr</i> system<br>(Bourgogne <i>et al.</i> 2006) |
|                 | EF0751            | 243  | WxL      |                                                                      |
|                 | EF0752            | 259  | WxL      |                                                                      |
|                 | EF0753            | 699  | WxL      |                                                                      |
|                 | EF0754            | 259  | WxL      |                                                                      |
|                 | EF0755            | 364  | DUF916   |                                                                      |
|                 | EF0756            | 149  | -        |                                                                      |
| EF1172-6        | EF1172            | 370  | -        | Possible teichoic acid biosynthesis protein B                        |
|                 | EF1173            | 248  | -        | WecB/TagA/CpsF family glycosyl transferase                           |
|                 | EF1174            | 197  | -        | Hypothetical protein                                                 |
|                 | EF1175            | 132  | Cwa      |                                                                      |
|                 | EF1176            | 354  | DUF916   |                                                                      |
| EF1216          | EF1216            | 239  | WxL      |                                                                      |
| EF2248-54       | EF2248            | 1004 | WxL      | probable internalin                                                  |
|                 | EF2249            | 72   | -        |                                                                      |
|                 | EF2250            | 647  | WxL      |                                                                      |
|                 | EF2252            | 109  | Cwa      |                                                                      |
|                 | EF2253            | 349  | DUF916   |                                                                      |
|                 | EF2254            | 222  | WxL      |                                                                      |
| EF2682-86       | EF2682            | 341  | DUF916   | probable internalin (Brinster <i>et al.</i> 2007a and b)             |
|                 | EF2683            | 258  | WxL      |                                                                      |
|                 | EF2684            | 260  | WxL      |                                                                      |
|                 | EF2685            | 122  | Cwa      |                                                                      |
|                 | EF2686            | 614  | WxL      |                                                                      |
| EF2967-70       | EF2967            | 74   | -        |                                                                      |
|                 | EF2968            | 122  | Cwa      |                                                                      |
|                 | EF2969            | 377  | DUF916   |                                                                      |
|                 | EF2970            | 229  | WxL      |                                                                      |
| EF3074-6        | EF3074            | 1294 | WxL      |                                                                      |
|                 | EF3075            | 1426 | WxL      |                                                                      |
|                 | EF3076            | 120  | Cwa      |                                                                      |
| EF3153-5        | EF3153            | 238  | WxL      | 78% P to OG1RF210 and 61% P to OG1RF209                              |
|                 | EF3154            | 236  | WxL      | 80% P to OG1RF210 and 64 %P to OG1RF209                              |
|                 | EF3155            | 232  | WxL      |                                                                      |
| OG1RF_0209-10   | OG1RF_0209        | 235  | WxL      |                                                                      |
|                 | OG1RF_0210        | 238  | WxL      |                                                                      |
| EF3181-8        | EF3181            | 483  | -        |                                                                      |
|                 | EF3182            | 161  | -        |                                                                      |
|                 | EF3183            | 358  | DUF916   |                                                                      |
|                 | EF3184            | 252  | WxL      |                                                                      |
|                 | EF3185            | 266  | WxL      |                                                                      |
|                 | EF3186            | 244  | WxL      |                                                                      |
|                 | EF3187            | 129  | Cwa      |                                                                      |
|                 | EF3188/OG1RF_213  | 1554 | WxL      |                                                                      |
| EF3248-53       | EF3248/OG1RF_0224 | 1252 | WxL      | 51% I/ 64% P                                                         |
|                 | EF3250/OG1RF_0225 | 645  | WxL      | 56% I/ 68% P                                                         |
|                 | EF3251/OG1RF_0226 | 311  | DUF916   | 21% I/ 38% P                                                         |
|                 | EF3252O/G1RF_0227 | 1265 | WxL      | 54% I/ 66% P                                                         |
|                 | EF3253            | 120  | Cwa      | 100% I                                                               |
| OG1RF_0128-0131 | OG1RF_0128        | 346  | DUF916   |                                                                      |
|                 | OG1RF_0129        | 184  | WxL      |                                                                      |
|                 | OG1RF_0130        | 120  | Cwa      |                                                                      |
|                 | OG1RF_0131        | 887  | -        |                                                                      |
