# Supplementary material for: Large scale variation in Enterococcus faecalis illustrated by the genome analysis of strain OG1RF
Source: PubMed Central journal article supplement (PMC2530867; doi:10.1186/gb-2008-9-7-r110), 2008-07-08
Supplement: gb-2008-9-7-r110-S4.pdf [file gb-2008-9-7-r110-S4.pdf]

Table X: primers used in this study

| Primer name         | length | Sequence (5' -> 3')  |
|---------------------|--------|----------------------|
| 14.8 kb fragment F1 | 18     | gagtgacgattcgacctg   |
| 14.8 kb fragment R1 | 18     | ggaacaccaatgacttgc   |
| 14.8 kb fragment F2 | 18     | ctgagggcattgaacttg   |
| 14.8 kb fragment R2 | 18     | tgattgccgtccctacta   |
| cas_csn2 F          | 20     | ctaccacttgttgcacttca |
| cas_csn2 R          | 20     | cgattaaagacgttcaaacc |
| cas1 F              | 20     | tttcattatcggaaatgctt |
| cas1 R              | 20     | ttgatgttttgttgttgaa  |
| cas_csn1 F          | 20     | gcaaagtcaaccactctctc |
| cas_csn1 R          | 20     | aagtccaaatcatcaccttg |
| ef0672-3 jct F      | 20     | tgccaatcatcattgttatc |
| ef0672-3 jct R      | 20     | cgtgtgaagatgaacgtaga |
| ef1896 F            | 18     | aagggaccaaccaagaag   |
| ef1896 R            | 18     | tccagattgccaagtagc   |
| iolE F              | 18     | attggacatcaacgcatc   |
| IolE R              | 18     | tgggtgtcgaacctattg   |
| iolR F              | 18     | tcctaatacgccacacta   |
| IolR R              | 18     | ttgctgaaaagcaggag    |
